# Supplementary material for: Adverse Effects on Work and Daily Life Interference among Healthcare Workers after the First and Second ChAdOx1 and BNT162b2 COVID-19 Vaccine Doses
Source: MDPI journal article supplement (doi:10.3390/vaccines9080926), 2021-08-19
Supplement: s1 [file s1]

**Table S1.** The association between severity of work and daily life interference and expression of each adverse effect after BNT162b2 vaccination.

|                                 | Interference in work |              |                | Interference in daily life |                |
|---------------------------------|----------------------|--------------|----------------|----------------------------|----------------|
|                                 | Total                | Low<br>(0–4) | High<br>(5–10) | Low<br>(0–4)               | High<br>(5–10) |
|                                 | (N=41)               | (N=26)       | (N=15)         | (N=26)                     | (N=15)         |
| Fever                           | 17 (41.5%)           | 4 (15.4%)    | 13 (86.7%)     | 2 (7.7%)                   | 15 (100.0%)    |
| Chills                          | 16 (39.0%)           | 4 (15.4%)    | 12 (80.0%)     | 4 (15.4%)                  | 12 (80.0%)     |
| Local pain                      | 28(68.3%)            | 16 (61.5%)   | 12 (80.0%)     | 15 (57.7%)                 | 13 (86.7%)     |
| Myalgia                         | 16 (39.0%)           | 3 (11.5%)    | 13 (86.7%)     | 3 (11.5%)                  | 13 (86.7%)     |
| Headache                        | 13 (31.7%)           | 3 (11.5%)    | 10 (66.7%)     | 3 (11.5%)                  | 10 (66.7%)     |
| Nausea                          | 3 (7.3%)             | 0 (0.0%)     | 3 (20.0%)      | 0 (0.0%)                   | 3 (20.0%)      |
| Vomiting                        | 1 (2.4%)             | 0 (0.0%)     | 1 (6.7%)       | 0 (0.0%)                   | 1 (6.7%)       |
| Urticaria                       | 0 (0.0%)             | 0 (0.0%)     | 0 (0.0%)       | 0 (0.0%)                   | 0 (0.0%)       |
| Dyspnea                         | 1 (2.4%)             | 0 (0.0%)     | 1 (6.7%)       | 0 (0.0%)                   | 1 (6.7%)       |
| Chest pain                      | 0 (0.0%)             | 0 (0.0%)     | 0 (0.0%)       | 0 (0.0%)                   | 0 (0.0%)       |
| Degree of total adverse effects | 3.7 ± 2.6            | 2.3 ± 2.0    | 6.2 ± 1.6      | 2.2 ± 1.9                  | 6.1 ± 1.7      |

The degree of total adverse effects was assessed using a 0–10 numeric scale.

Abbreviations: OR, odds ratio; CI, confidence interval
